# Supplementary material
Source: PubMed Central journal article supplement (PMC6065168)
Supplement: supp_RA118.003490_137481_1_supp_144978_p9flc7.pdf [file supp_RA118.003490_137481_1_supp_144978_p9flc7.pdf]

Specific binding between *Bacillus thuringiensis* Cry9Aa and Vip3Aa toxins synergizes their toxicity against Asiatic rice borer (*Chilo suppressalis*)

Zeyu Wang<sup>1,2</sup>, Longfa Fang<sup>1</sup>, Zishan Zhou<sup>1</sup>, Sabino Pacheco<sup>2</sup>, Isabel Gómez<sup>2</sup>,  
Fuping Song<sup>1</sup>, Mario Soberón<sup>2</sup>, Jie Zhang<sup>1,\*</sup> and Alejandra Bravo<sup>2,\*</sup>

List of the material included: two supporting figures, four supporting tables and one supporting method.

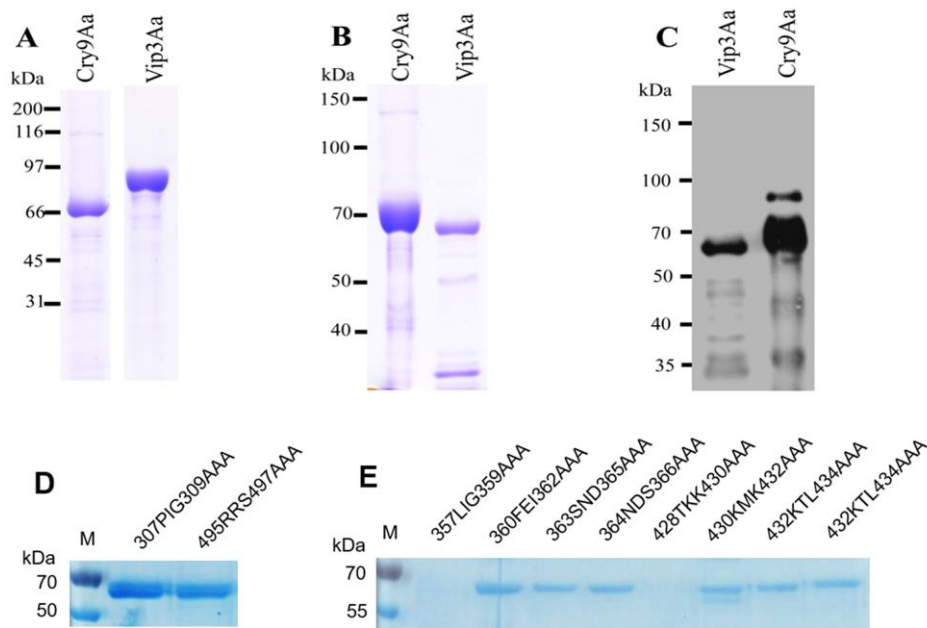

**Figure S1. Analysis of Cry9Aa and Vip3Aa proteins.** (Panel A) shows SDS-PAGE of the soluble Vip3Aa protoxin and Cry9Aa toxin fragment (655 amino acids) purified by Ni-affinity purification. (Panel B) shows SDS-PAGE of trypsin activated Cry9Aa and Vip3Aa toxins. (Panel C) shows Western-blot of the biotinylated Cry9Aa and Vip3Aa toxins detected with Streptavidin. (Panel D) shows trypsin activation of Cry9Aa-R495A/R496A/S497A mutant and another representative mutant (Cry9Aa-P307A/I308A/G309A mutant). (Panel E) shows trypsin activation of different Vip3Aa mutants including Vip3Aa-K432A/T433A/L434A.

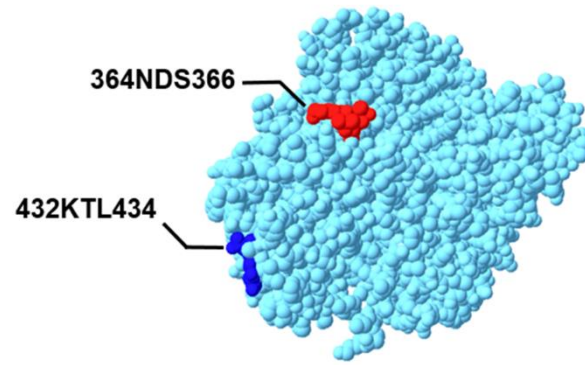

**Figure S2.** Model of the three dimensional structure of Vip3Aa constructed by using QUARK protein structure prediction since this is suitable for proteins which are considered without homologous templates (<https://zhanglab.ccmb.med.umich.edu/QUARK/>).

**Table S1. Bioassays of insecticidal activity of Cry9Aa and Vip3Aa toxins against *Ostrinia furnacalis* larvae.**

| Toxins                                                 | Observed LC <sub>50</sub><br>in µg/g diet<br>(95% confidence limits) | Expected LC <sub>50</sub><br>in µg/g diet | Synergy factor<br>(SF) |
|--------------------------------------------------------|----------------------------------------------------------------------|-------------------------------------------|------------------------|
| Cry9Aa                                                 | 5.89 (4.39-7.88)                                                     |                                           |                        |
| Vip3Aa                                                 | >150                                                                 |                                           |                        |
| Cry9Aa+ Vip3Aa                                         | 2.51 (1.65-3.81)                                                     | 11.3                                      | 4.5                    |
| Cry9Aa-R495A/R496A/S497A                               | 21.7 (14.5-34.9)                                                     |                                           |                        |
| Vip3Aa-K432A/T433A/L434A                               | >150                                                                 |                                           |                        |
| Cry9Aa- R495A/R496A/S497A + Vip3Aa                     | 50.9 <sup>a</sup>                                                    | 37.9                                      | 0.76                   |
| Cry9Aa+ Vip3Aa-4K432A/T433A/L434A                      | 1.99 (0.359-10.2)                                                    | 11.3                                      | 5.7                    |
| Cry9Aa-R495A/R496A/S497A+<br>Vip3Aa- K432A/T433A/L434A | 60.5 (42.3-112)                                                      | 37.9                                      | 0.63                   |

<sup>a</sup>, confidence limits not statistical significant

**Table S2.** Primers for amplification of the different Cry9Aa and Vip3Aa fragments

| Primer name  | DNA Sequence (5'→3')                         | Restriction site |
|--------------|----------------------------------------------|------------------|
| Cry9Aa D1-F  | CGCGGATCCGATGAATCAAATAAACACGG                | <i>Bam</i> H I   |
| Cry9Aa D1-R  | CCGCTCGAGCGGCCAACTTTCTCCCCTAAGACTAC          | <i>Xho</i> I     |
| Cry9Aa D2-F  | CGCGGATCCGTACCCAATAGAAACAGATTTTCAGTTGAGTAGGG | <i>Bam</i> H I   |
| Cry9Aa D2-R  | CCGCTCGAGCGGACGAGCCAGACTTTTATGTGTCCAACCATAC  | <i>Xho</i> I     |
| Cry9Aa D3-F  | CGCGGATCCGAACAATACCATTAATCCAGATAGAATTAC      | <i>Bam</i> H I   |
| Cry9Aa D3-R  | CCGCTCGAGCGGAACTGGAATGAACTCAATTCTATCTAC      | <i>Xho</i> I     |
| Vip3Aa F1-F  | CGGATCCGATGAACAAGAATAATACTAAATTAAG           | <i>Bam</i> H I   |
| Vip3Aa F1-R  | CCGCTCGAGCGGGTAAACAATTGCAAGAGATTTCT          | <i>Xho</i> I     |
| Vip3Aa F2-F  | CGGATCCGGATGTTAATAACAACTCGATG                | <i>Bam</i> H I   |
| Vip3Aa F2-R  | CCGCTCGAGCGGCCCGAATAAATTATTCCTAC             | <i>Xho</i> I     |
| Vip3Aa F3-F  | CGGATCCGGATAAGTTGGATATTATTAATG               | <i>Bam</i> H I   |
| Vip3Aa F3-R  | CCGCTCGAGCGGATCTGCTAAGCCTAATAATTTTC          | <i>Xho</i> I     |
| Vip3Aa F4-F  | CGGATCCGCGTTCAGCTTTAAAAACTGC                 | <i>Bam</i> H I   |
| Vip3Aa F4-R  | CCGCTCGAGCGGTAATTTATCCATATCACCATAAATAAC      | <i>Xho</i> I     |
| Vip3Aa F5-F  | CGGATCCGATTGATTATACTTCTATTATG                | <i>Bam</i> H I   |
| Vip3Aa F5-R  | CCGCTCGAGCGGGTCAATTTCTCTGTAGAAG              | <i>Xho</i> I     |
| Vip3Aa F6-F  | CGGATCCGAAACCAGGACATGCATTGATTG               | <i>Bam</i> H I   |
| Vip3Aa F6-R  | CCGCTCGAGCGGTGAATTTTCATCAGCTTG               | <i>Xho</i> I     |
| Vip3Aa F7-F  | CGGATCCGTGCCAGATCAATCTGAAC                   | <i>Bam</i> H I   |
| Vip3Aa F7-R  | CCGCTCGAGCGGCTCTAAATTGCCTCTTCTATG            | <i>Xho</i> I     |
| Vip3Aa F8-F  | CGGATCCGTTAATTACTTTAACATGTAAATC              | <i>Bam</i> H I   |
| Vip3Aa F8-R  | CCGCTCGAGCGGACTTTTTAAAATTAATAACAC            | <i>Xho</i> I     |
| Vip3Aa F9-F  | CGGATCCGAAAGGAAAACCTTCTATTC                  | <i>Bam</i> H I   |
| Vip3Aa F9-R  | CCGCTCGAGCGGAGCACCGCTCATATATCTTTTTTC         | <i>Xho</i> I     |
| Vip3Aa F10-F | CGGATCCGCAAATGGAGATGAAGCTTG                  | <i>Bam</i> H I   |
| Vip3Aa F10-R | CCGCTCGAGCGGCTTAATAGAGACATCGTAAAAATG         | <i>Xho</i> I     |

Restriction sites were underlined

**Table S3.** Primers used for mutagenesis of Cry9Aa and Vip3Aa proteins

| Primer name         | DNA Sequence (5'→3')                                     |
|---------------------|----------------------------------------------------------|
| Cry9Aa 307PIG309AAA | GGGTCATTTATACAGATGCAGCTGCTTTTGTACATCGTAGTAGTCTTAGGGG     |
| Cry9Aa 316LRH318AAA | GGTTTTGTACATCGTAGTAGTGTGCGGCAGAAAGTTGGTTTAGCTTTG         |
| Cry9Aa 325VNR327AAA | GAAAGTTGGTTTAGCTTTGCTGCTGCAGCTAATTTCTCAGATTTAG           |
| Cry9Aa 359PVS361AAA | CTACTGGTTCACCTTACATTGGCGGCTGCCCAAGTACTGATAGAGCGAGGG      |
| Cry9Aa 364TDR366AAA | CATTGCCGGTTAGCCCAAGTGCTGCTGCAGCGAGGGTATGGTATGGAAGTCG     |
| Cry9Aa 393HTT395AAA | CTGAACTAATCTCTGGACAAGCTGCGGCTGCTACACAAACTATT             |
| Cry9Aa 416NDT418AAA | GATTCTCAAGCTTGTAATTTAGCTGCTGCCACATATGGAGTGAATAGGGCGG     |
| Cry9Aa 422VNR424AAA | GTAATTTAAATGATACCACATATGGAGCGGCTGCGGCGGTATTTTATCATGATGCG |
| Cry9Aa 488LRG490AAA | CAACAATAAATTTAACAGGAGGAGCTGCAGCAGTAGCATCTAATCGCCGTTT     |
| Cry9Aa 495RRS497AAA | GGACTTAGACAAGTAGCATCTAATGCCGCTGCATCTTTAGTAATGTATGGTTGG   |
| Vip3Aa 357LIG359AAA | GAAGCTAAACCAGGACATGCAGCGGCTGCGTTTGAAATTAGTAATGATTC       |
| Vip3Aa 360FEI362AAA | CCAGGACATGCATTGATTGGGGCTGCAGCTAGTAATGATTCAATTACAG        |
| Vip3Aa 363SND365AAA | CATTGATTGGGTTTGAAATTGCTGCTGCTTCAATTACAGTATTTAAAAG        |
| Vip3Aa 364NDS366AAA | CATTGATTGGGTTTGAAATTGCTGCTGCTTCAATTACAGTATTTAAAAG        |
| Vip3Aa 428TKK430AAA | GTAATTACTAAAATTGATTTTCGCTGCAGCAATGAAAACCTTTAAGATATG      |
| Vip3Aa 430KMK432AAA | CTAAAATTGATTTCACTAAAGCAGCGGCAACTTTAAGATATGAGGTAAC        |
| Vip3Aa 432KTL435AAA | GATTTCACTAAAAAATGGCAGCTGCAAGATATGAGGTAACAGCG             |

**Table S4.** Determination of APN enzymatic activity in *Chilo suppressalis* midgut membrane

| Extraction from midgut | APN enzymatic activity (U/mg) | The ratio of BBMV/<br>Midgut homogenate |
|------------------------|-------------------------------|-----------------------------------------|
| BBMV                   | 38.04                         | 4.25 folds                              |
| Midgut homogenate      | 8.95                          |                                         |

The ratio of BBMV/ midgut homogenate suggests that the BBMV sample is well prepared.

### **Supporting methods**

**The Preparation of Cry9Aa and Vip3Aa Antibodies.** The anti-Cry9Aa or anti-Vip3Aa polyclonal antibodies were raised in New Zealand white rabbits (from facilities of IBT-UNAM) after subcutaneous immunization with purified Vip3Aa or Cry9Aa toxins. The rabbits were boosted three times with 1 mg of the toxins mixed with incomplete Freund's adjuvant, at 15-day intervals. Blood serum was obtained and the specificity and sensitivity of the polyclonal antisera was determined in a dot blot assay using different concentrations of Vip3Aa or Cry9Aa toxins spotted on nitrocellulose strips and analyzed with different concentrations of the polyclonal anti-Vip3Aa or anti-Cry9Aa antibodies (from 1: 10,000 to 1: 50,000 dilutions) and the secondary goat anti-rabbit antibody coupled to HRP (diluted 1: 10,000).
